# Supplementary material for: The Impact and Determinants of Mountainous Topographical Factors on Soil Microbial Community Characteristics
Source: MDPI journal article supplement (doi:10.3390/microorganisms11122878), 2023-11-28
Supplement: s1 [file s1]

# Supplementary Material

Supporting Information for the manuscript paper entitled: “***The impact and determinants of mountainous topographical factors on soil microbial community characteristics***” by Jiantao Yu <sup>1</sup>, Suyan Li <sup>1,\*</sup>, Xiangyang Sun <sup>1</sup>, Wenzhi Zhou <sup>1</sup>, Libing He <sup>1</sup>, Guanyu Zhao <sup>1</sup>, Zhe Chen <sup>1</sup>, Xueting Bai <sup>1</sup>, Jinshuo, Zhang <sup>1</sup>

<sup>1</sup> The Key Laboratory for Silviculture and Conservation of Ministry of Education, College of Forestry, Beijing Forestry University, Beijing 100083, China.

\* Correspondence: [lisuyan@bjfu.edu.cn](mailto:lisuyan@bjfu.edu.cn); [sunxybjfusoil@163.com](mailto:sunxybjfusoil@163.com)

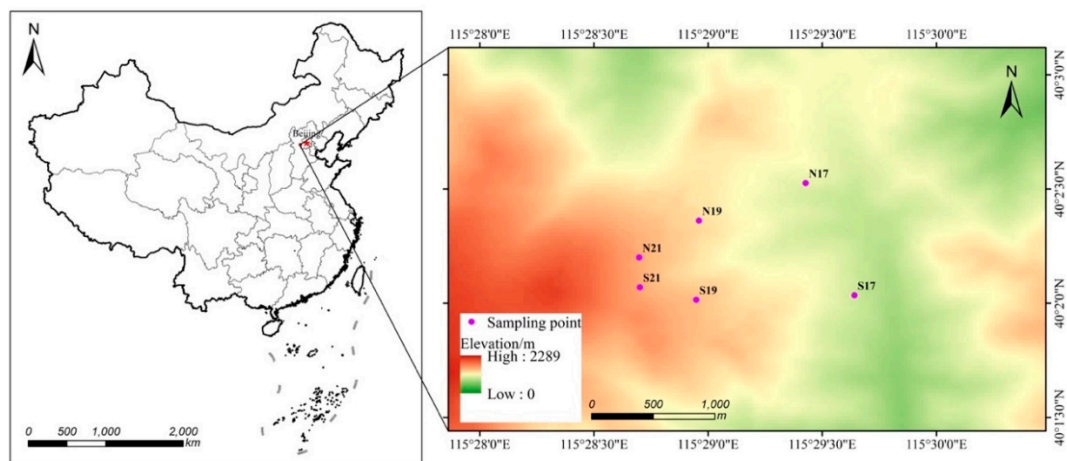

**Figure S1.** Location of the research area

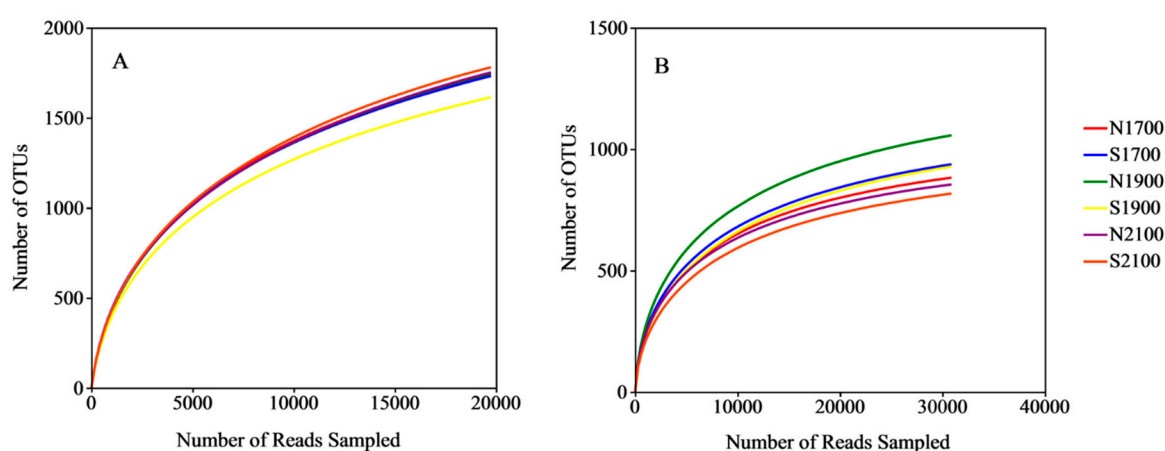

**Figure S2.** Rarefaction contours of operational taxonomic units (OTUs) for soil bacterial (A) and fungal (B) communities. N for north, shady slopes, S for south, sunny slopes

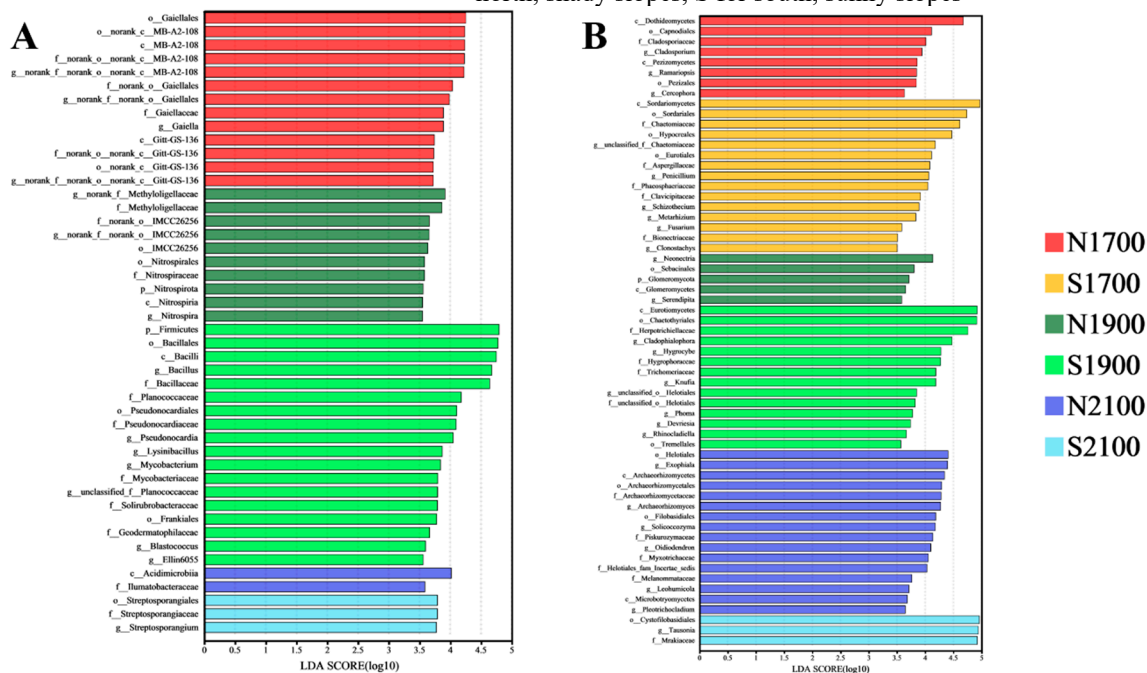

**Figure S3.** Variations in the community structure of soil bacteria (A) and fungi (B) at various altitudes and slope. N for north, shady slopes, S for south, sunny slopes

**Table S1.** The soil physicochemical properties for South-facing slop and North-facing slop soils in different altitudes.

|                            |       | Soil<br>pH | BD<br>(g·cm <sup>-3</sup> ) | Soil<br>moisture<br>(%) | SOC<br>(g·kg <sup>-1</sup> ) | TN<br>(g·kg <sup>-1</sup> ) | TP<br>(g·kg <sup>-1</sup> ) | TK<br>(g·kg <sup>-1</sup> ) | AP<br>(mg·kg <sup>-1</sup> ) | AK<br>(mg·kg <sup>-1</sup> ) | NH <sub>4</sub> <sup>+</sup> -N<br>(mg·kg <sup>-1</sup> ) | NO <sub>3</sub> <sup>-</sup> -N<br>(mg·kg <sup>-1</sup> ) |
|----------------------------|-------|------------|-----------------------------|-------------------------|------------------------------|-----------------------------|-----------------------------|-----------------------------|------------------------------|------------------------------|-----------------------------------------------------------|-----------------------------------------------------------|
| South-facing<br>slop       | S1700 | 7.21±0.03  | 1.13±0.04                   | 28.24±2.72              | 32.52±1.74                   | 2.40±0.02                   | 0.59±0.04                   | 17.95±0.46                  | 25.00±2.64                   | 156.33±2.08                  | 6.92±0.61                                                 | 1.19±0.30                                                 |
|                            |       | Aa         | Aa                          | Ab                      | Ac                           | Aa                          | Aa                          | Ac                          | Aa                           | Ab                           | Ab                                                        | Aa                                                        |
|                            | S1900 | 7.21±0.14  | 1.05±0.07                   | 33.75±2.91              | 54.86±0.86                   | 2.15±0.03                   | 0.56±0.01                   | 29.25±0.43                  | 17.60±3.48                   | 248.33±1.53                  | 10.96±2.37                                                | 1.31±0.06                                                 |
|                            |       | Aa         | Aa                          | Aa                      | Aa                           | Ac                          | Aa                          | Aa                          | Bb                           | Aa                           | Aa                                                        | Aa                                                        |
|                            | S2100 | 7.00±0.02  | 1.10±0.15                   | 32.10±1.42              | 44.62±0.60                   | 2.30±0.02                   | 0.58±0.05                   | 23.75±1.42                  | 22.93±1.84                   | 140.33±2.08                  | 6.01±0.51                                                 | 1.00±0.14                                                 |
|                            |       | Ab         | Aa                          | Aab                     | Ab                           | Ab                          | Aa                          | Ab                          | Aab                          | Ac                           | Bb                                                        | Aa                                                        |
| North-facing<br>slop       | N1700 | 7.26±0.12  | 1.01±0.04                   | 32.30±3.20              | 34.91±1.72                   | 2.40±0.03                   | 0.69±0.06                   | 18.66±1.42                  | 21.46±3.12                   | 129.67±2.08                  | 5.72±2.31                                                 | 0.83±0.52                                                 |
|                            |       | Aa         | Aa                          | Ab                      | Aa                           | Aa                          | Aa                          | Ab                          | Ab                           | Bb                           | Ab                                                        | Aa                                                        |
|                            | N1900 | 7.10±0.13  | 0.73±0.12                   | 41.51±1.38              | 55.36±1.18                   | 2.32±0.17                   | 0.60±0.05                   | 23.59±1.03                  | 30.98±1.88                   | 222.33±1.52                  | 9.58±0.94                                                 | 1.41±0.23                                                 |
|                            |       | Aab        | Bb                          | Ba                      | Aa                           | Aa                          | Ab                          | Ba                          | Aa                           | Ba                           | Aa                                                        | Aa                                                        |
|                            | N2100 | 6.95±0.02  | 0.97±0.07                   | 35.21±3.53              | 45.15±1.44                   | 2.25±0.07                   | 0.54±0.02                   | 24.50±1.14                  | 22.92±3.30                   | 128.33±2.09                  | 8.67±0.14                                                 | 1.15±0.04                                                 |
|                            |       | Ab         | Aa                          | Ba                      | Aa                           | Aa                          | Ab                          | Aa                          | Ab                           | Bb                           | Aa                                                        | Aa                                                        |
| Slope aspect               |       | ns         | **                          | ***                     | ns                           | ns                          | ns                          | *                           | **                           | ***                          | ns                                                        | ns                                                        |
| Altitude                   |       | **         | *                           | ***                     | ***                          | **                          | *                           | ***                         | ns                           | ***                          | **                                                        | ns                                                        |
| Slope aspect<br>× Altitude |       | ns         | ns                          | ns                      | ns                           | *                           | *                           | ***                         | ***                          | ***                          | ns                                                        | ns                                                        |

Note: BD: Soil bulk density; TN: Total nitrogen; TP: total phosphorus; AK: Available potassium; SOC: soil organic carbon; TK: total potassium AP: Available phosphorus; NO<sub>3</sub><sup>-</sup>-N: Nitrate nitrogen; NH<sub>4</sub><sup>+</sup>-N: Ammonium nitrogen; Upper case letters indicate differences between shaded and sunny slopes ( $p < 0.05$ ). Lowercase letters indicate three different elevation gradients ( $p < 0.05$ ). Non-significance is denoted by NS, while \*, \*\*, \*\*\* indicate statistical significance at  $p < 0.05$ ,  $p < 0.01$ ,  $p < 0.001$ , respectively. N for north, shady slopes, S for south, sunny slopes, for example: N1700 means 1700m above sea level on the north slope.

**Table S2.** Two-way variance analysis of dominant bacterial phyla and classes

| Taxonomy |                     | Slope aspect |     | Altitude |     | Slope aspect×Altitude |     |
|----------|---------------------|--------------|-----|----------|-----|-----------------------|-----|
|          |                     | F            | P   | F        | P   | F                     | P   |
| Phyla    | Actinobacteriota    | 9.505        | **  | -        | -   | -                     | -   |
|          | Proteobacteria      | -            | -   | 4.705    | *   | -                     | -   |
|          | Acidobacteriota     | -            | -   | -        | -   | -                     | -   |
|          | Firmicutes          | -            | -   | 15.057   | *** | -                     | -   |
|          | Chloroflexi         | -            | -   | 8.441    | **  | -                     | -   |
|          | Gemmatimonadota     | -            | -   | 7.476    | **  | -                     | -   |
|          | Verrucomicrobiota   | -            | -   | -        | -   | -                     | -   |
|          | Methyloirabiolota   | 4.922        | *   | 3.967    | *   | 9.146                 | **  |
|          | Bacteroidota        | -            | -   | 8.897    | **  | -                     | -   |
|          | Myxococcota         | 5.023        | *   | -        | -   | -                     | -   |
|          | Planctomycetota     | 10.588       | **  | -        | -   | -                     | -   |
|          | others              | 7.771        | *   | -        | -   | 16.103                | *** |
| Classes  | Alphaproteobacteria | -            | -   | 4.277    | *   | -                     | ns  |
|          | Actinobacteria      | -            | -   | 7.234    | **  | 4.722                 | *   |
|          | Thermoleophilia     | 15.128       | **  | -        | -   | -                     | -   |
|          | Bacilli             | -            | -   | 14.792   | *** | -                     | -   |
|          | Vicinamibacteria    | -            | -   | -        | -   | -                     | -   |
|          | Blastocatellia      | -            | -   | -        | -   | -                     | -   |
|          | Gammaproteobacteria | -            | -   | -        | -   | -                     | -   |
|          | KD4-96              | -            | -   | 6.199    | *   | -                     | -   |
|          | Acidimicrobiia      | 24.658       | *** | -        | -   | -                     | -   |

|                  |       |   |        |    |       |    |
|------------------|-------|---|--------|----|-------|----|
| MB-A2-108        | -     | - | 10.936 | ** | -     | -  |
| Gemmatimonadetes | -     | - | 6.593  | *  | -     | -  |
| Verrucomicrobiae | -     | - | -      | -  | -     | -  |
| Methylomirabilia | 4.922 | * | 3.967  | *  | 9.146 | ** |
| Bacteroidia      | -     | - | 9.360  | ** | -     | -  |
| Chloroflexia     | -     | - | -      | -  | -     | -  |
| Anaerolineae     | -     | - | 3.970  | *  | -     | -  |
| Acidobacteriae   | -     | - | -      | -  | -     | -  |
| Gitt-GS-136      | -     | - | 11.087 | ** | -     | -  |
| others           | -     | - | -      | -  | 7.013 | *  |

Note: - indicates non-significance, \*, \*\*, and \*\*\* indicate significance at  $p < 0.05$ ,  $p < 0.01$  and  $p < 0.001$ , eachly.

**Table S3.** Two-way variance analysis of dominant fungal phyla and classes

| Taxonomy |                           | Slope aspect |     | Altitude |     | Slope aspect×Altitude |     |
|----------|---------------------------|--------------|-----|----------|-----|-----------------------|-----|
|          |                           | F            | P   | F        | P   | F                     | P   |
| Phyla    | Ascomycota                | -            | -   | -        | -   | 5.727                 | *   |
|          | Mortierellomycota         | -            | -   | -        | -   | -                     | -   |
|          | Basidiomycota             | -            | -   | -        | -   | -                     | -   |
|          | unclassified_k_Fungi      | -            | -   | -        | -   | -                     | -   |
|          | Chytridiomycota           | 6.805        | *   | 8.110    | **  | 11.330                | **  |
|          | Glomeromycota             | -            | -   | 8.393    | **  | 15.146                | *** |
|          | others                    | -            | -   | -        | -   | -                     | -   |
| Classes  | Mortierellomycetes        | -            | -   | -        | -   | -                     | -   |
|          | Sordariomycetes           | -            | -   | 17.141   | *** | 4.222                 | *   |
|          | Eurotiomycetes            | 8.768        | *   | 7.095    | **  | 4.278                 | *   |
|          | Agaricomycetes            | -            | -   | -        | -   | -                     | -   |
|          | Dothideomycetes           | -            | -   | 7.321    | **  | 5.124                 | *   |
|          | Tremellomycetes           | -            | -   | -        | -   | -                     | -   |
|          | Leotiomycetes             | 6.127        | *   | 6.639    | *   | -                     | -   |
|          | unclassified_p_Ascomycota | -            | -   | -        | -   | -                     | -   |
|          | unclassified_k_Fungi      | -            | -   | -        | -   | -                     | -   |
|          | Archaeorhizomycetes       | 8.522        | *   | 4.669    | *   | 4.338                 | *   |
|          | Chytridiomycota           | 6.090        | *   | 7.673    | **  | 10.660                | **  |
|          | Glomeromycetes            | -            | -   | 5.098    | *   | 8.594                 | **  |
|          | Pezizomycetes             | 19.513       | *** | -        | -   | -                     | -   |
|          | Microbotryomycetes        | -            | -   | 5.363    | *   | 7.586                 | **  |
|          | others                    | 9.102        | *   | -        | -   | -                     | -   |

Note: - indicates non-significance, \*, \*\*, and \*\*\* indicate significance at  $p < 0.05$ ,  $p < 0.01$  and  $p < 0.001$ , correspondingly
